# Supplementary material
Source: publisher site journal article supplement (https://www.dovepress.com/get_supplementary_file.php?f=399567.docx)
Supplement: Supplementary file 1 [file get_supplementary_file.php]

SUPPLEMENTARY MATERIAL

TITLE

Lasmiditan in Japanese Patients with Common Migraine Comorbidities and Concomitant Medications: A Post Hoc Safety and Efficacy Analysis from the MONONOFU Study

AUTHORS

Shidekazu KITAMURA1

Noboru IMAI2

Yuka TANJI3

Akichika OZEKI3

Mika KOMORI3

AUTHORS’ AFFILIATIONS

1Department of Neurology,Konan Kakogawa Hospital, Hyogo, Japan

2Department of Neurology,Japanese Red Cross Shizuoka Hospital, Shizuoka, Japan

3Japan Drug Development and Medical Affairs, Eli Lilly Japan K.K., Kobe, Japan

CORRESPONDENCE

Mika Komori

Japan Drug Development and Medical Affairs

Eli Lilly Japan K.K.

5-1-28, Isogamidori, Chuo-ku

Kobe-shi 651-0086

Japan

Tel: +81-78-242-8391

Fax: +81-78-242-9939

Email: komori_mika@lilly.com

**LIST OF TABLES**

**Supplementary Table 1.** List of IRBs Providing Approval for the MONONOFU Study

**Supplementary Table 2.** Most Common Comorbidities (Occurring in ≥10% of Any Lasmiditan Dose Group) by SOC (Safety Population)

**Supplementary Table 3** Pain Freedom at 2 Hours Post Dose by Comorbidity and Treatment Group (mITT Population)

**Supplementary Table 1** List of IRBs Providing Approval for the MONONOFU Study

| **Name of IRB** |
| --- |
| Chibune General Hospital IRB |
| Dokkyo Medical University Hospital IRB |
| Goshozuka Clinic IRB |
| Japanese Red Cross Shizuoka Hospital IRB |
| Konan Medical Center IRB |
| Kumamoto City Hospital IRB |
| Memorial Meiwa Hospital IRB |
| Nakamura Memorial Hospital IRB |
| Nishinomiya Municipal Central Hospital IRB |
| Okayama City General Medical Center Okayama City Hospital IRB |
| Osaka Saiseikai Nakatsu Hospital IRB |
| Saitama Medical University Hospital IRB |
| Shinagawa East One Medical Clinic IRB |
| SUBARU Health Insurance Society Ota Memorial Hospital IRB |
| Sugiura Clinic IRB |
| Takanoko Hospital IRB |
| Tatsuoka Neurology Clinic IRB |
| Tokyo-Eki Center-building Clinic IRB |
| Tominaga Hospital IRB |

**Abbreviation:** IRB, Institutional Review Board.

**Supplementary Table 2** Most Common Comorbidities (Occurring in ≥10% of Any Lasmiditan Dose Group) by SOC (Safety Population)

| **SOCa**  **PTa** | **PBO**  **(n=214)** | **LTN 50 mg**  **(n=87)** | **LTN 100 mg**  **(n=208)** | **LTN 200 mg**  **(n=182)** | **All LTN**  **(n=477)** | **All Patients**  **(N=691)** |
| --- | --- | --- | --- | --- | --- | --- |
| Patients with any comorbidity | 199 (93.0) | 81 (93.1) | 194 (93.3) | 169 (92.9) | 444 (93.1) | 643 (93.1) |
| Gastrointestinal disease | 85 (39.7) | 30 (34.5) | 73 (35.1) | 70 (38.5) | 173 (36.3) | 258 (37.3) |
| Chronic gastritis | 18 (8.4) | 8 (9.2) | 23 (11.1) | 16 (8.8) | 47 (9.9) | 65 (9.4) |
| Constipation | 19 (8.9) | 9 (10.3) | 20 (9.6) | 16 (8.8) | 45 (9.4) | 64 (9.3) |
| Nervous system disorders | 67 (31.3) | 24 (27.6) | 67 (32.2) | 65 (35.7) | 156 (32.7) | 223 (32.3) |
| Tension-type headache | 37 (17.3) | 14 (16.1) | 37 (17.8) | 40 (22.0) | 91 (19.1) | 128 (18.5) |
| Cervicobrachial syndrome | 39 (18.2) | 11 (12.6) | 38 (18.3) | 31 (17.0) | 80 (16.8) | 119 (17.2) |
| Respiratory, thoracic, mediastinal disease | 59 (27.6) | 29 (33.3) | 64 (30.8) | 52 (28.6) | 145 (30.4) | 204 (29.5) |
| Allergic rhinitis | 36 (16.8) | 19 (21.8) | 51 (24.5) | 40 (22.0) | 110 (23.1) | 146 (21.1) |
| Musculoskeletal and connective tissue diseases | 47 (22.0) | 26 (29.9) | 57 (27.4) | 55 (30.2) | 138 (28.9) | 185 (26.8) |
| Musculoskeletal stiffness | 21 (9.8) | 13 (14.9) | 17 (8.2) | 21 (11.5) | 51 (10.7) | 72 (10.4) |
| Immune system disorders | 58 (27.1) | 22 (25.3) | 57 (27.4) | 48 (26.4) | 127 (26.6) | 185 (26.8) |
| Seasonal allergies | 56 (26.2) | 22 (25.3) | 57 (27.4) | 48 (26.4) | 127 (26.6) | 183 (26.5) |
| Infections and infestations | 52 (24.3) | 17 (19.5) | 56 (26.9) | 50 (27.5) | 123 (25.8) | 175 (25.3) |
| Nasopharyngitis | 27 (12.6) | 9 (10.3) | 31 (14.9) | 24 (13.2) | 64 (13.4) | 91 (13.2) |
| Reproductive system and breast disorders | 50 (23.4) | 21 (24.1) | 48 (23.1) | 40 (22.0) | 109 (22.9) | 159 (23.0) |
| Dysmenorrhoea | 19 (10.7) | 11 (14.7) | 24 (13.6) | 22 (15.2) | 57 (14.4) | 76 (13.2) |
| Psychiatric disorders | 34 (15.9) | 8 (9.2) | 31 (14.9) | 22 (12.1) | 61 (12.8) | 95 (13.7) |
| Insomnia | 26 (12.1) | 6 (6.9) | 23 (11.1) | 15 (8.2) | 44 (9.2) | 70 (10.1) |

Note: Data are n (%).

aSOC and PT from MedDRA Version 23.0.

**Abbreviations:** LTN, lasmiditan; MedDRA, Medical Dictionary for Regulatory Activities; PBO, placebo; PT, Preferred Term; SOC, System Organ Class.

**Supplementary Table 3** Pain Freedom at 2 Hours Post Dose by Comorbidity and Treatment Group (mITT Population)

| **Proportion by Comorbidity (PT)a,  n1/n2b (%)** | **PBO** | **All LTN** | **OR (95% CI),  All LTN vs PBO** | **p-Value  vs PBO** | **p-Valuec** |
| --- | --- | --- | --- | --- | --- |
| Seasonal allergies |  |  |  |  |  |
| Yes | 8/55 (14.5) | 45/126 (35.7) | 3.29 (1.43–7.57) | 0.005 | 0.524 |
| No | 27/156 (17.3) | 115/345 (33.3) | 2.39 (1.49–3.84) | <0.001 |  |
| Allergic rhinitis |  |  |  |  |  |
| Yes | 9/36 (25.0) | 39/109 (35.8) | 1.67 (0.71–3.91) | 0.238 | 0.272 |
| No | 26/175 (14.9) | 121/362 (33.4) | 2.88 (1.80–4.61) | <0.001 |  |
| Tension-type headache |  |  |  |  |  |
| Yes | 8/37 (21.6) | 34/89 (38.2) | 2.29 (0.93–5.62) | 0.070 | 0.727 |
| No | 27/174 (15.5) | 126/382 (33.0) | 2.69 (1.69–4.27) | <0.001 |  |
| Cervicobrachial syndrome |  |  |  |  |  |
| Yes | 6/39 (15.4) | 26/79 (32.9) | 2.65 (0.97–7.21) | 0.057 | 0.923 |
| No | 29/172 (16.9) | 134/392 (34.2) | 2.57 (1.63–4.03) | <0.001 |  |
| Dysmenorrhoea |  |  |  |  |  |
| Yes | 4/19 (21.1) | 15/56 (26.8) | 1.35 (0.38–4.74) | 0.640 | 0.292 |
| No | 31/192 (16.1) | 145/415 (34.9) | 2.79 (1.81–4.31) | <0.001 |  |
|  |  |  |  |  |  |
| Nasopharyngitis |  |  |  |  |  |
| Yes | 5/27 (18.5) | 25/64 (39.1) | 2.79 (0.93–8.42) | 0.068 | 0.861 |
| No | 30/184 (16.3) | 135/407 (33.2) | 2.55 (1.64–3.96) | <0.001 |  |
| Musculoskeletal stiffness |  |  |  |  |  |
| Yes | 4/19 (21.1) | 18/51 (35.3) | 1.89 (0.53–6.71) | 0.322 | 0.697 |
| No | 31/192 (16.1) | 142/420 (33.8) | 2.65 (1.71–4.09) | <0.001 |  |
| Chronic gastritis |  |  |  |  |  |
| Yes | 3/18 (16.7) | 17/47 (36.2) | 2.83 (0.72–11.20) | 0.138 | 0.890 |
| No | 32/193 (16.6) | 143/424 (33.7) | 2.56 (1.67–3.93) | <0.001 |  |
| Constipation |  |  |  |  |  |
| Yes | 6/19 (31.6) | 44/18 (40.9) | 1.51 (0.48–4.72) | 0.479 | 0.317 |
| No | 29/192 (15.1) | 142/427 (33.3) | 2.80 (1.80–4.36) | <0.001 |  |
| Insomnia |  |  |  |  |  |
| Yes | 8/26 (30.8) | 18/43 (41.9) | 1.68 (0.59–4.77) | 0.331 | 0.309 |
| No | 27/185 (14.6) | 142/428 (33.2) | 2.90 (1.84–4.58) | <0.001 |  |

aPTs for comorbidities from MedDRA Version 23.0.

bWhere n1 = number of patients who achieved pain freedom in the comorbidity–treatment group and n2 = total number of patients in the comorbidity–treatment group.

cp-Values from logistic regression model for the treatment-by-comorbidity condition interaction.

**Abbreviations:** CI, confidence interval; LTN, lasmiditan; MedDRA, Medical Dictionary for Regulatory Activities; mITT, modified intent-to-treat; OR, odds ratio; PBO, placebo; PT, Preferred Term.
